# Supplementary material
Source: HighWire-hosted journal article supplement (https://www.g3journal.org/content/suppl/2017/06/06/g3.117.042119)
Supplement: FigureS3.pdf [file FigureS3.pdf]

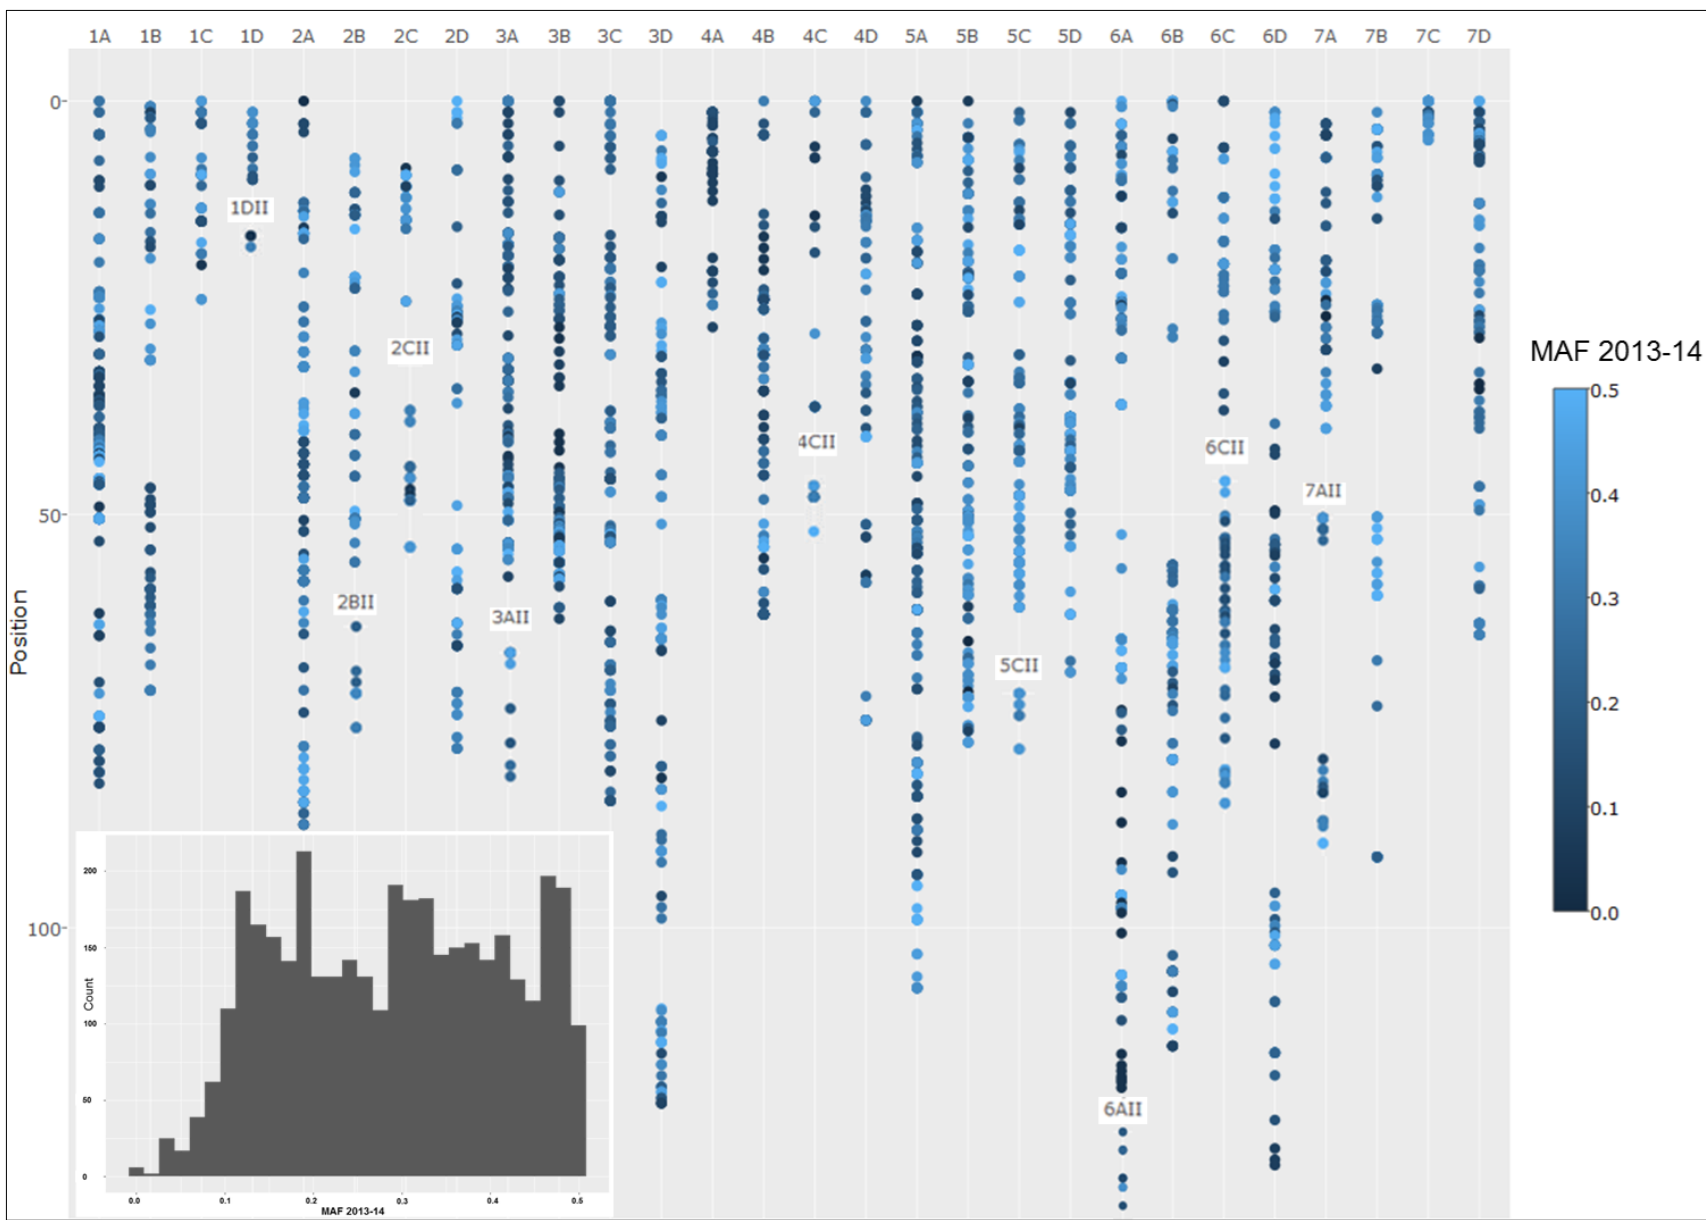

**Supplementary Figure S3** Distribution of markers and their minor allele frequencies for the linkage map and multiparental population set used for QTL discovery in 2013-14
